# Supplementary material for: Separation of sulfated fucose-containing isomers found in polysaccharides from brown seaweed using cyclic ion mobility mass spectrometry
Source: Royal Society of Chemistry journal article supplement (doi:10.1039/d6ra00238b), 2026-05-12
Supplement: d6ra00238b1.pdf [file d6ra00238b1.pdf]

## Supporting Information

### Separation of Sulfated Fucose-containing Isomers Found in Polysaccharides from Brown Seaweed using Cyclic Ion Mobility Mass Spectrometry

Olivia M. Wyper<sup>1</sup>, Karl J. Jobst<sup>1\*</sup>, Francesca M. Kerton<sup>1,\*</sup>

1. Memorial University of Newfoundland, St. John's, Canada

*Table S1: Structures of sulfated fucose residues of interest with typical m/z values*

| Compound                                                                           | Chemical Formula                                                             | Structure | m/z (Exact Mass)     |
|------------------------------------------------------------------------------------|------------------------------------------------------------------------------|-----------|----------------------|
| [FucSO <sub>3</sub> -H <sub>2</sub> O] <sup>-</sup>                                | C <sub>6</sub> H <sub>9</sub> O <sub>7</sub> S <sup>-</sup>                  |           | 225.0074             |
| [Fuc <sub>3</sub> (SO <sub>3</sub> ) <sub>2</sub> -H <sub>2</sub> O] <sup>2-</sup> | C <sub>18</sub> H <sub>28</sub> O <sub>18</sub> S <sub>2</sub> <sup>2-</sup> |           | 298.0364<br>(z = -2) |
| [Gal] <sup>-</sup>                                                                 | C <sub>12</sub> H <sub>21</sub> O <sub>12</sub> <sup>-</sup>                 |           | 357.1038             |
| [FucSO <sub>3</sub> ] <sup>-</sup>                                                 | C <sub>6</sub> H <sub>11</sub> O <sub>8</sub> S <sup>-</sup>                 |           | 243.0180             |
| [Gal <sub>2</sub> SO <sub>3</sub> ] <sup>-</sup>                                   | C <sub>12</sub> H <sub>21</sub> O <sub>14</sub> S <sup>-</sup>               |           | 421.0657             |

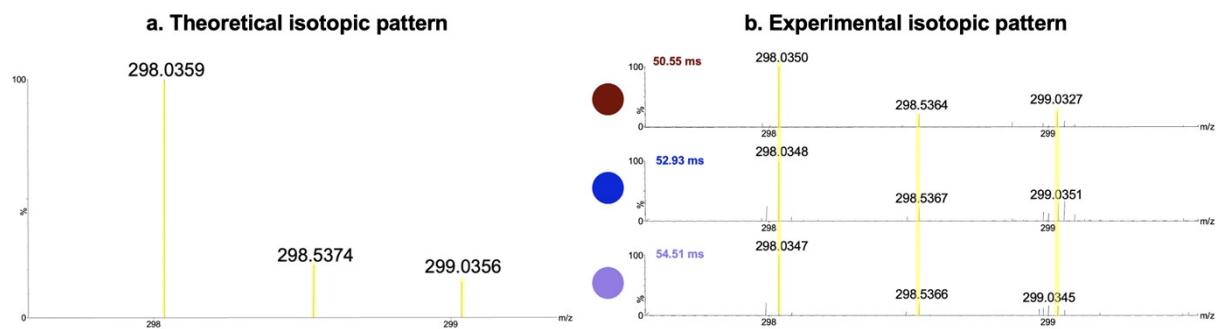

Figure S1: a. Theoretical isotopic pattern for  $[Fuc_3(SO_3)_2-H_2O]^{2-}$  b. Experimental isotopic pattern for isomers at 50.55, 52.93, and 54.51 ms for  $[Fuc_3(SO_3)_2-H_2O]^{2-}$
